# Supplementary material
Source: PubMed Central journal article supplement (PMC3879613)
Supplement: supp_M113.030569_mcp.M113.030569-1.pdf [file supp_M113.030569_mcp.M113.030569-1.pdf]

## Supplementary Data for

### Proteome modulation in H9c2 cardiac cells by miR-378 and miR-378\*

Mallat Youssef<sup>1</sup>, Tritsch Eva<sup>1</sup>, Ladouce Romain<sup>2</sup>, Winter Daniel Lorenz<sup>1</sup>, Friguet Bertrand<sup>2</sup>, Li Z<sup>1</sup>, Mericskay Mathias<sup>1§</sup>.

#### Running Title

Proteomics identification of miR-378 and miR-378\* targets

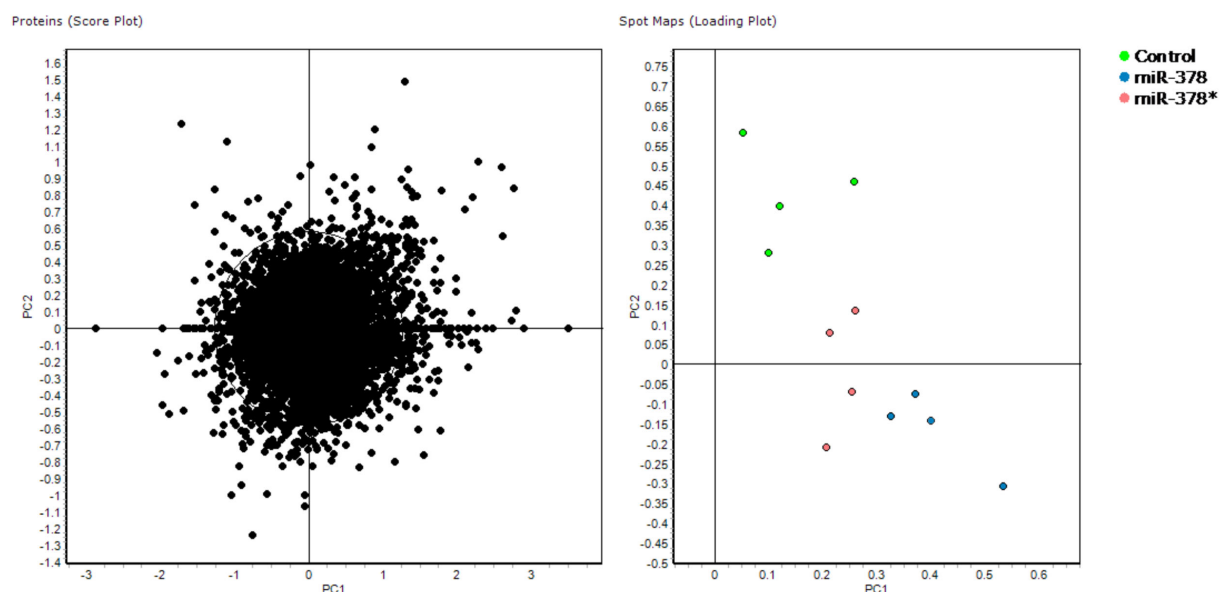

Figure S1: Principal component analysis (PCA) of spot maps versus all proteins.

Left panel: spot loading plot. Right panel: Without spot preselection and with a global analysis, spot maps are separated following experimental groups (control, miR-378 transfection, miR-378\* transfection).

Proteomics identification of miR-378 and miR-378\* targets – Supplementary Data

|                                       |                   |            |                               |
|---------------------------------------|-------------------|------------|-------------------------------|
| rno-miR-378                           | 3' ggaagacugaggu  | UCAGGUca   | 5'                            |
| mRNA                                  |                   | 5' AGUCCAG | 3'                            |
| rno-miR-378*                          | 3' uguguccuggaccu | CAGUCCUc   | 5'                            |
| mRNA                                  |                   | 3' GUCAGGA | 5'                            |
| <br>                                  |                   |            |                               |
| <b>Ldha</b>                           |                   |            |                               |
| Positions 9802-9807                   | uccuagcacuucacu   | GUCCAG     | gucgagcag                     |
| Position 9367-9371                    | uccuagcacuucacu   | GUCCAG     | gucgagcag                     |
| Position 13246-13250                  | cacugaaacaugccu   | AGUCCA     | acauuuuuucc                   |
|                                       |                   |            | Rat                           |
|                                       |                   |            | Mouse                         |
|                                       |                   |            | Human                         |
| <br>                                  |                   |            |                               |
| <b>Gmppa</b>                          |                   |            |                               |
| Position 7325-7330                    | ugccugaccagcucu   | GUCCAG     | aaaggaccug                    |
| Position 7130-7135                    | ugccuggcuagcucu   | GUCCAG     | aaaggaccug                    |
| Position 8005-8010                    | gcuuggccagccucu   | GUCCAG     | aaaggaccug                    |
|                                       |                   |            | Rat                           |
|                                       |                   |            | Mouse                         |
|                                       |                   |            | Human                         |
| <br>                                  |                   |            |                               |
| <b>Actn4</b>                          |                   |            |                               |
| Positions 72372-72377 and 72397-72402 | agccccaugugccuu   | GUCCAG     | gaaccgcccuaaga                |
| Positions 68399-68404 and 68424-68429 | agccccaugugccuu   | GUCCAG     | gaaccgcccuaaga                |
| Position 82209-82214                  | agccccaugugccuu   | GUCCAG     | gaaccgcccuaaga                |
|                                       |                   |            | Rat                           |
|                                       |                   |            | Mouse                         |
|                                       |                   |            | Human                         |
| <br>                                  |                   |            |                               |
| <b>Acts</b>                           |                   |            |                               |
| Position 2806-2811                    | uacgcgucucucucc   | UCAGGA     | cgacaauca                     |
| Position 2762-2767                    | uacgcgucucucucc   | UCAGGA     | cgacaauca                     |
| Position 2806-2811                    | uacgcgucucucucc   | UCAGGA     | cgacaauca                     |
|                                       |                   |            | Rat                           |
|                                       |                   |            | Mouse                         |
|                                       |                   |            | Human                         |
| <br>                                  |                   |            |                               |
| <b>Vim</b>                            |                   |            |                               |
| Position 8268-8273                    | gccuuuacugcaguuu  | UCAGGA     | gcgcaagaau                    |
| Position 8303-8308                    | ccuuuacugcaguuu   | UCAGGA     | gcgcaagaau                    |
| Position 9112-9117                    | gccuuuacugcaguuu  | UCAGGA     | gcgcaagaau                    |
|                                       |                   |            | Rat                           |
|                                       |                   |            | Mouse                         |
|                                       |                   |            | Human                         |
| <br>                                  |                   |            |                               |
| <b>Calu</b>                           |                   |            |                               |
| Positions 25760-25765                 | gaucaauaagaauugu  | UCAGGA     | agagaauaagc                   |
| Position 26809-26814                  | gaucaauaagaauugu  | UCAGGA     | agagaauaagc                   |
| Position 30295-30300                  | gaucaauaagaauugu  | UCAGGA     | agagaauaagc                   |
|                                       |                   |            | Rat                           |
|                                       |                   |            | Mouse                         |
|                                       |                   |            | Human                         |
| <br>                                  |                   |            |                               |
| <b>Grp78</b>                          |                   |            |                               |
| Positions 3880-3885 and 4390-4396     | auuguuaauacuggac  | UCAGGA     | acuuucguug...uuucacagugccca   |
| Positions 4067-4072 and 4577-4583     | auuguuaauacuggac  | UCAGGA     | acuuucguug...uuucacagugccca   |
| Positions 4837-4842 and 5349-5355     | auuguuaauacuggac  | UCAGGA     | acuuucguug...uuucacagugccca   |
|                                       |                   |            | Rat                           |
|                                       |                   |            | Mouse                         |
|                                       |                   |            | Human                         |
| <br>                                  |                   |            |                               |
| <b>Ppia</b>                           |                   |            |                               |
| Positions 3735-3740 and 3842-3847     | cauggagcguuuugg   | GUCCAG     | gaauuggcaag...ccauuccuucugugc |
| Positions 3684-3689 and 3792-3797     | cauggagcguuuugg   | GUCCAG     | gaauuggcaag...ccauuccuucugugc |
| Positions 4721-4726 and 4829-4834     | cauggagcguuuugg   | GUCCAG     | gaauuggcaag...ccauuccuucugugc |
|                                       |                   |            | Rat                           |
|                                       |                   |            | Mouse                         |
|                                       |                   |            | Human                         |

Figure S2: 3'UTR sequence conservation between rat, mouse and human. Seed match 7mer ± m8 binding sites are shown in red for miR-378 and in blue for miR-378\*. Positions are based on numbering from the GenBank gene database.
